# Supplementary material for: Direct observations of microbial community succession on sinking marine particles
Source: PubMed Central journal article supplement (PMC10811735; doi:10.1093/ismejo/wrad010), 2024-01-10
Supplement: exports_np_isme_supplement_nov_2023_wrad010.pdf [file exports_np_isme_supplement_nov_2023_wrad010.pdf]

1 **Supplemental Information**

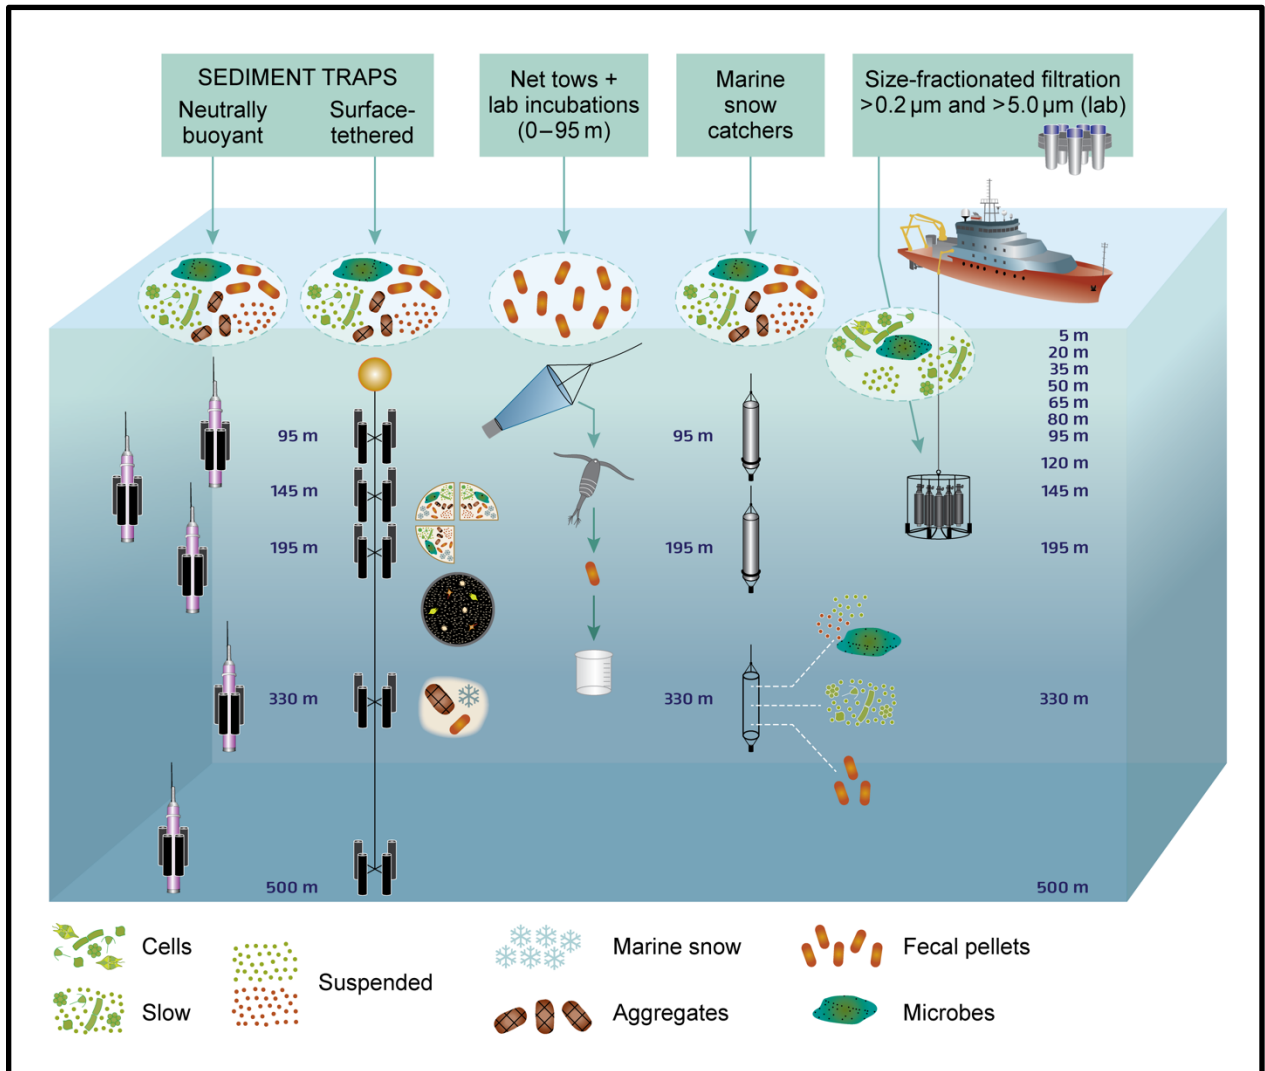

2

3 **Supplementary Fig. 1. | Sampling methods employed during the North Pacific EXPORTS**  
 4 **cruise.** Sampling methods included the collection of samples representing individual particles  
 5 from gels and the bulk assemblage from sediment traps, net tows followed by shipboard  
 6 incubations of zooplankton, marine snow catchers (MSCs) and size-fractionated filtration from  
 7 water collected using Niskin bottles. Noted are the range of particle types sampled by each  
 8 method and the depths from which the samples were collected. Two sediment trap types were  
 9 deployed (neutrally buoyant and surface-tethered), and individual particles from gels and bulk  
 10 particle samples were collected from both types of traps. Net tows collected samples over 0 to 95  
 11 m depths. Samples from the MSCs were divided into non-sinking, slowly-sinking and fast-  
 12 sinking fractions. Size-fractionation was performed in series for 95 to 500 m depths, where 5.0  
 13 μm filtrate was filtered through 0.2 μm. Samples collected onto 0.2 μm without pre-filtration  
 14 were also collected separately and found to have similar communities to the 0.2 to 5.0 μm filter  
 15 samples collected by size-fractionation.

16

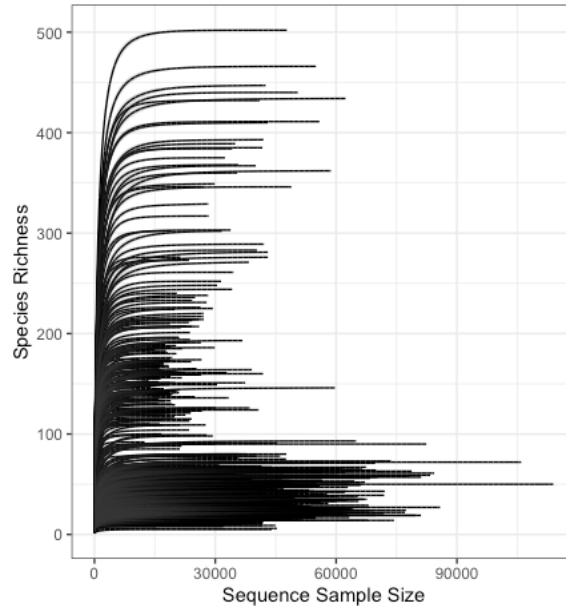

17  
18 **Supplementary Fig. 2. | Rarefaction curves for samples analyzed in manuscript. 578**  
19 **samples were analyzed at an average read depth of  $36,629 \pm 16,565$  reads per sample. All**  
20 **samples reached a maximum species richness by 5,000 reads.**  
21

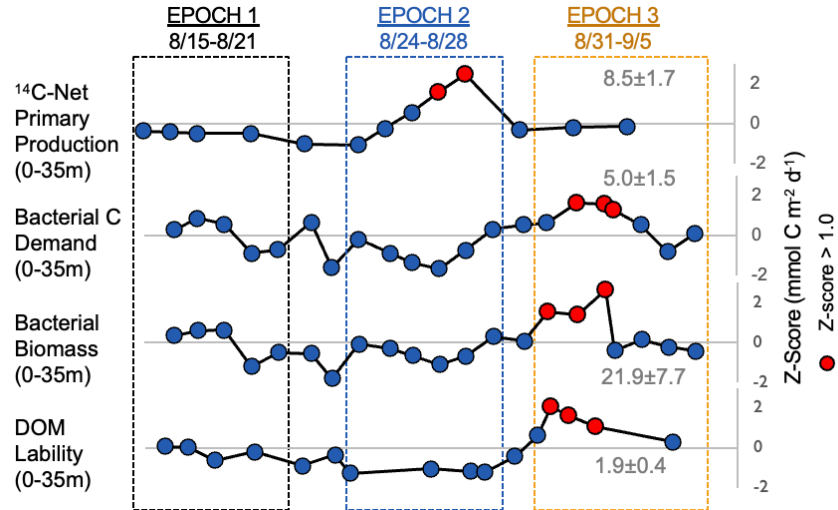

22

23 **Supplementary Fig. 3. | Temporal changes in surface production bacterial dynamics and**  
 24 **DOM lability.** Mixed layer <sup>14</sup>C-net primary production, bacterioplankton carbon demand  
 25 (BCD), bacterioplankton biomass (BB) and dissolved organic matter (DOM) lability exhibited  
 26 significant increases (<1.0 standard deviation from the mean; denoted by red circles) during in  
 27 the 3<sup>rd</sup> EPOCH of the 24-day station occupation. Data for NPP, BCD, BB and DOM lability as  
 28 published in Stephens et al. (2023) [1]. The DOM lability values are derived from an amino acid-  
 29 based indicator of degradation. Noted for each measurement are the cruise mean ± standard  
 30 deviation in grey text within each subplot, and the depths for which the data are presented in  
 31 parentheses on the lefthand axis.

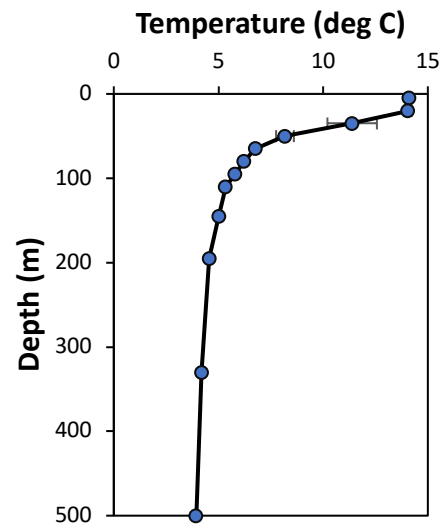

32  
33 **Supplementary Fig. 4. | Mean temperature profile collected from EXPORTS cruise**  
34 **RR1813 in the North Pacific.** Error bars represent the standard deviations for 24 profiles, from  
35 August 15<sup>th</sup> to September 4<sup>th</sup>, 2018.

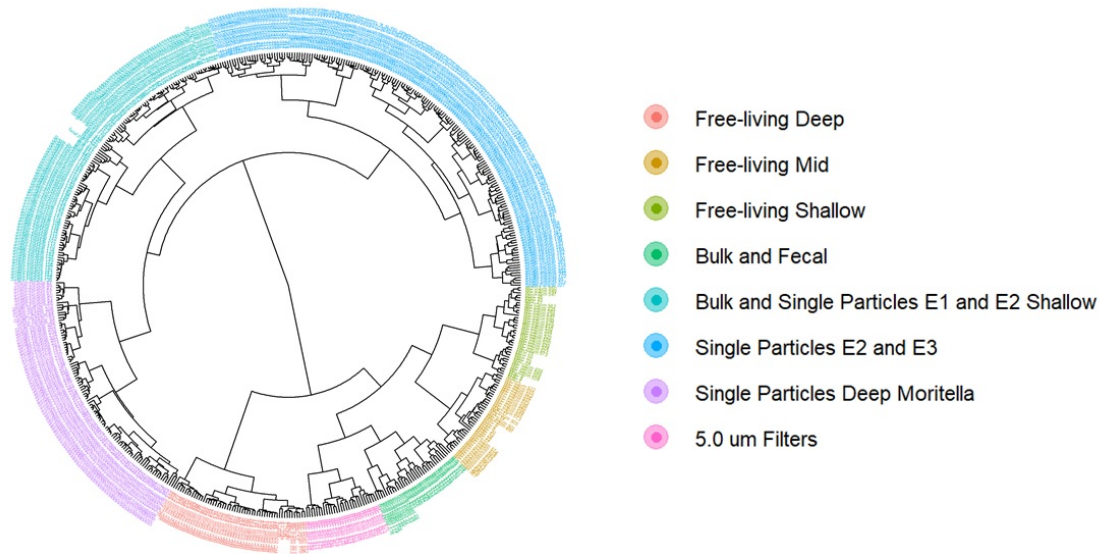

36

37 **Supplementary Fig. 5. | Clustering of amplicon-based communities by sample type. Bray-**  
38 **Curtis-based clustering ( $k = 8$ ) among sample collection types presented here.**

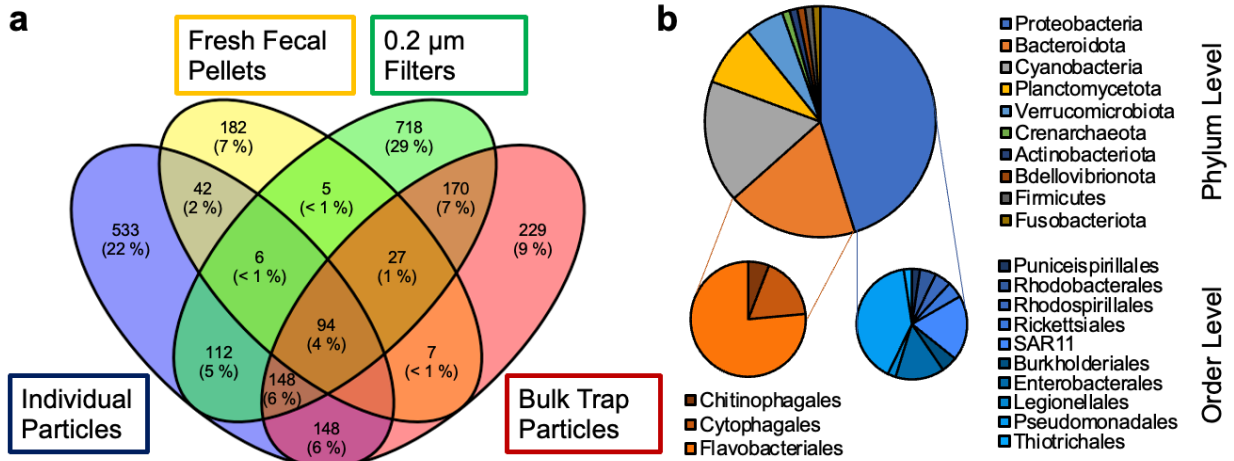

39  
 40 **Supplementary Fig. 6. | Shared taxa by sample type.** (a) Venn diagram of shared amplicon  
 41 sequence variants (ASVs) across four of the sample collection types presented here. (b) Of the 94  
 42 shared ASVs, 45 % were *Proteobacteria*, 18 % were *Bacteroidota* and 17 % were  
 43 *Cyanobacteria*. Of the shared *Proteobacteria* ASVs, 40 % were *Pseudomonadales*, 19 % were  
 44 SAR11 and 14 % were *Enterobacterales*. And of the shared *Bacteroidota* ASVs, 76 % were  
 45 *Flavobacteriales* and 18 % were *Cytophagales*.

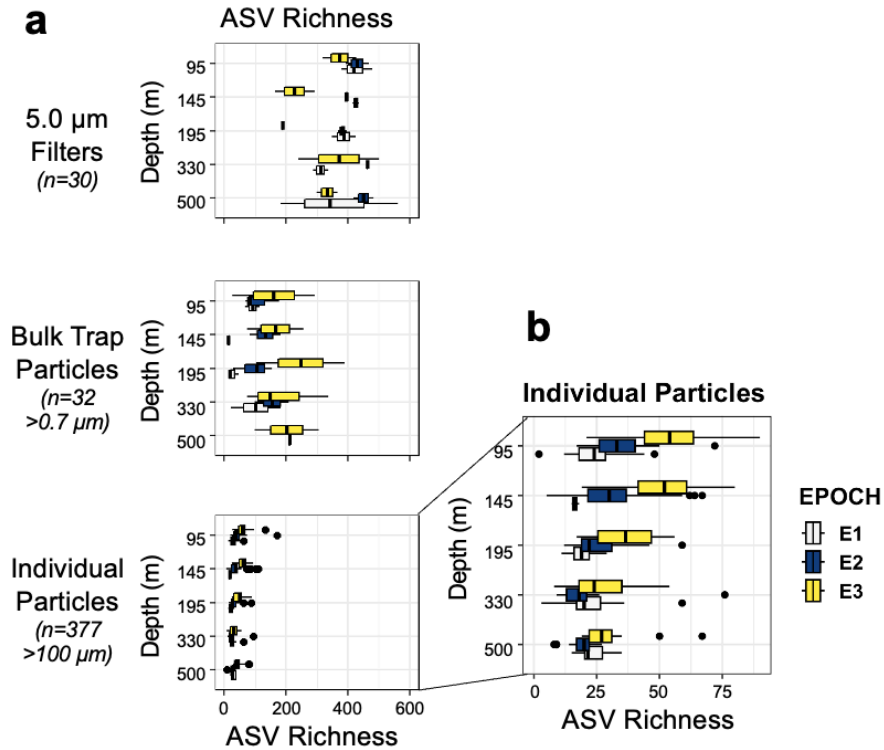

46

47 **Supplementary Fig. 7. | ASV richness differed by EPOCH and by sample type. (a)**

48 Amplicon sequence variant (ASV) richness differed by EPOCH for different particle collection

49 types (i.e., 5.0  $\mu\text{m}$  filters, bulk particles, individual particles). (b) Individual particle depth trends

50 with a constrained x-axis highlighting the elevated ASV Richness during Epoch 3. Blue boxes =

51 Epoch 1, white boxes = Epoch 2 and yellow boxes = Epoch 3. The line inside the box plots

52 represents the median ASV richness, whiskers represent the minimum and maximum values

53 excluding outliers and the dots represent outliers (1.5 times the interquartile range).

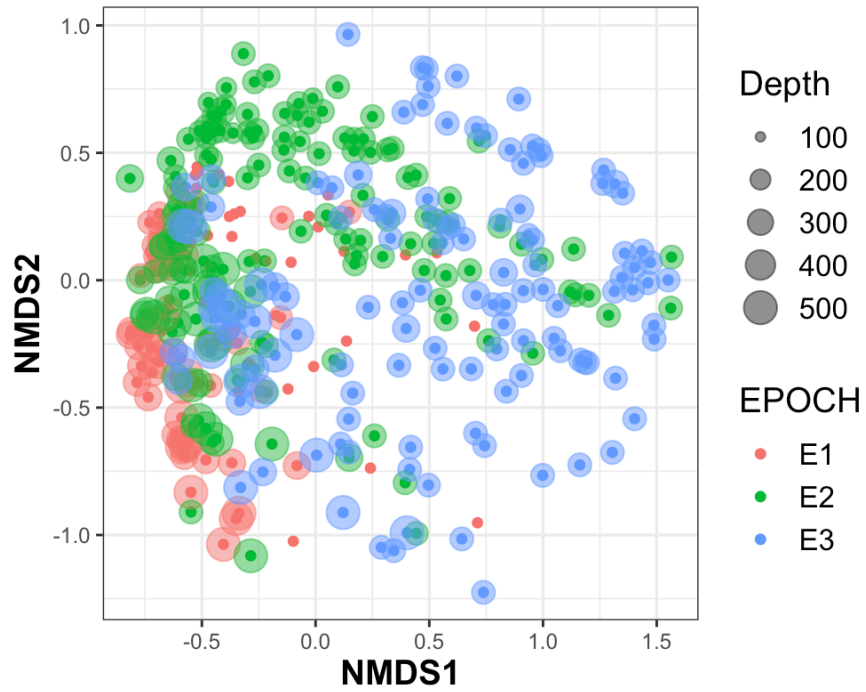

54

55 **Supplementary Fig. 8. | Individual particle communities differed by Epoch.** Non-parametric  
56 multidimensional scaling ordination of 16S rRNA gene amplicon sequence variants for  
57 individual particles exhibited modest differences based on time (i.e., Epoch). “E” = Epoch.



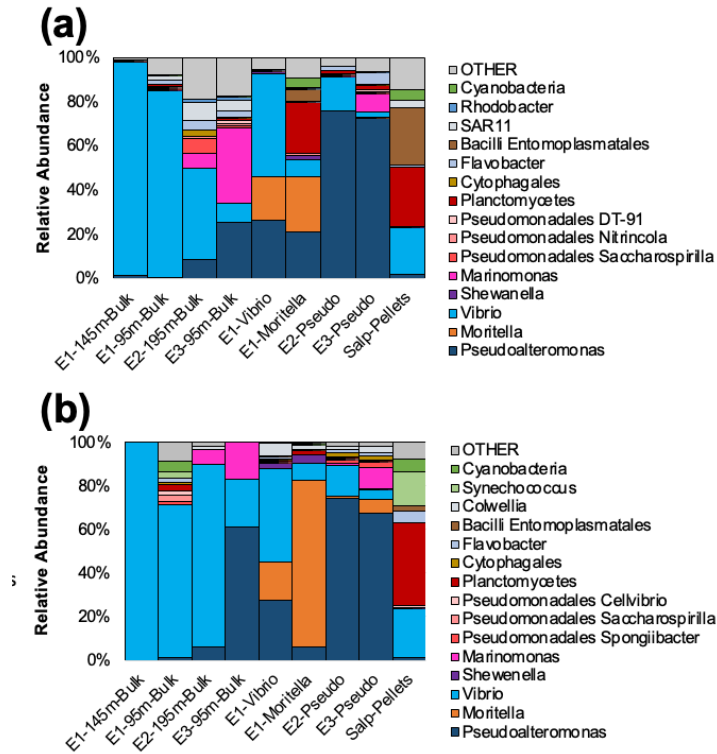

58  
59  
60  
61  
62

**Supplementary Fig. 9. | Communities characterized by different sequencing methods were similar.** Comparison of relative abundances for taxa determined by (a) metagenomic sequencing (Illumina NextSeq) and based on the *recA* gene and genome-based taxonomy database (GTDB) and (b) 16S rRNA gene amplicon sequencing, the DADA2 pipeline and Silva database v138.1.

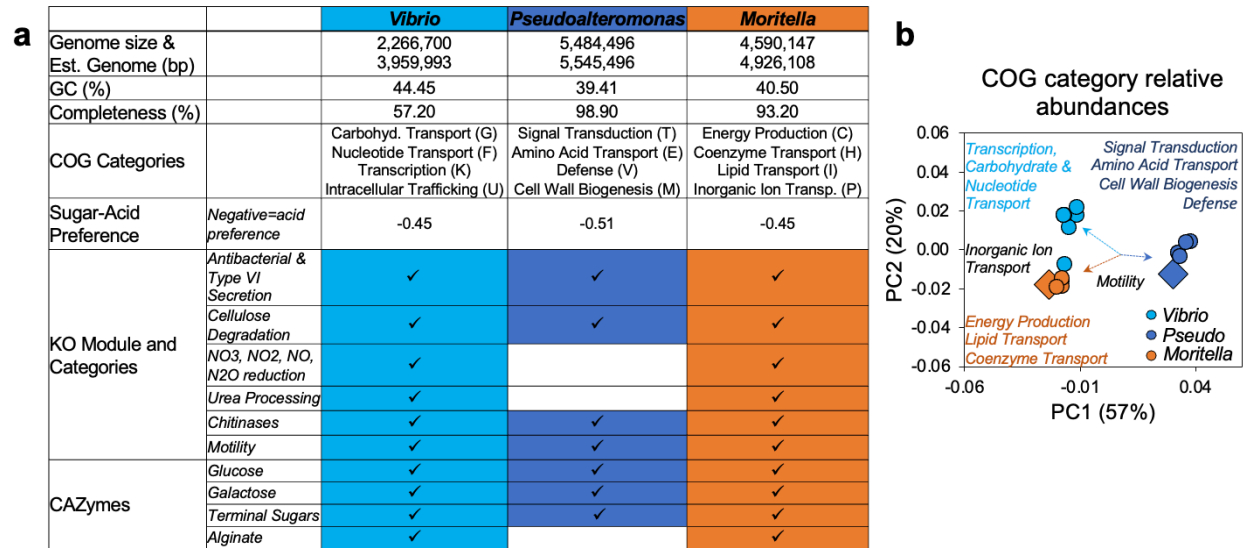

63  
 64 **Supplementary Fig. 10. | Dominant taxa on individual particles differ in their metabolism.**  
 65 (a). The relative contributions and/or presence of clusters of orthologous groups (COGs) of  
 66 protein categories, KEGG orthology (KO) modules and carbohydrate-active enzyme (CAZyme)  
 67 pathways differed in metagenome assembled genomes (MAGs) of *Pseudoalteromonas*, *Moritella*  
 68 and *Vibrio*. The sugar-acid preference was determined based on the number of sugars and acids  
 69 that each organism can grow on (Gralka et al., 2023) [2]. (b) Metabolic capability from the three  
 70 dominant taxa differs in ordination space based on the relative contributions of different COGs in  
 71 each taxon. MAGs obtained from individual particles (large diamonds) were supplemented with  
 72 the sequenced genomes from the Integrated Microbial Genomes and Microbiomes database  
 73 (small circles) with >99.5 % identity similarity.

74 **Supplementary Table 2. | Mean relative abundances of clusters of orthologous genes (COG)**  
 75 **categories for MAGs and publicly available genomes.**

| <b>Function ID</b> | <b>Function Name</b>                                                 | <i>Moritella</i> | <i>Vibrio</i> | <i>Pseudo-alteromonas</i> |
|--------------------|----------------------------------------------------------------------|------------------|---------------|---------------------------|
| C                  | <i>Energy production and conversion</i>                              | 6%               | 6%            | 5%                        |
| D                  | <i>Cell cycle control, cell division, chromosome partitioning</i>    | 1%               | 1%            | 1%                        |
| E                  | <i>Amino acid transport and metabolism</i>                           | 8%               | 9%            | 8%                        |
| F                  | <i>Nucleotide transport and metabolism</i>                           | 3%               | 3%            | 2%                        |
| G                  | <i>Carbohydrate transport and metabolism</i>                         | 4%               | 6%            | 4%                        |
| H                  | <i>Coenzyme transport and metabolism</i>                             | 5%               | 5%            | 4%                        |
| I                  | <i>Lipid transport and metabolism</i>                                | 4%               | 3%            | 4%                        |
| J                  | <i>Translation, ribosomal structure and biogenesis</i>               | 7%               | 7%            | 7%                        |
| K                  | <i>Transcription</i>                                                 | 7%               | 8%            | 7%                        |
| L                  | <i>Replication, recombination and repair</i>                         | 4%               | 4%            | 4%                        |
| M                  | <i>Cell wall/membrane/envelope biogenesis</i>                        | 6%               | 6%            | 7%                        |
| N                  | <i>Cell motility</i>                                                 | 4%               | 3%            | 4%                        |
| O                  | <i>Posttranslational modification, protein turnover, chaperones</i>  | 5%               | 5%            | 5%                        |
| P                  | <i>Inorganic ion transport and metabolism</i>                        | 5%               | 5%            | 5%                        |
| Q                  | <i>Secondary metabolites biosynthesis, transport and catabolism</i>  | 2%               | 2%            | 2%                        |
| T                  | <i>Signal transduction mechanisms</i>                                | 7%               | 7%            | 9%                        |
| U                  | <i>Intracellular trafficking, secretion, and vesicular transport</i> | 3%               | 3%            | 2%                        |
| V                  | <i>Defense mechanisms</i>                                            | 2%               | 3%            | 3%                        |

76

77

78 **Supplemental References**

79

- 80 1. Stephens BM, Fox J, Liu S, Halsey KH, Nicholson DP, Traylor S, et al. Influence of  
81 amino acids on bacterioplankton production, biomass and community composition at  
82 Ocean Station Papa in the subarctic Pacific. *Elementa* 2023; **11**.
- 83 2. Gralka M, Pollak S, Cordero OX. Genome content predicts the carbon catabolic  
84 preferences of heterotrophic bacteria. *Nature Microbiology* 2023 8:10 2023; **8**: 1799–  
85 1808.

86
